# Supplementary material
Source: PubMed Central journal article supplement (PMC9444970)
Supplement: NIHMS1826425-supplement-1.pdf [file NIHMS1826425-supplement-1.pdf]

# Supplementary Figure 1

**A**

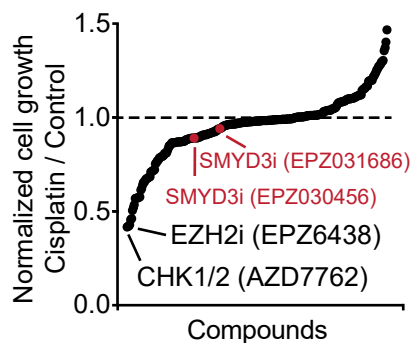

**B**

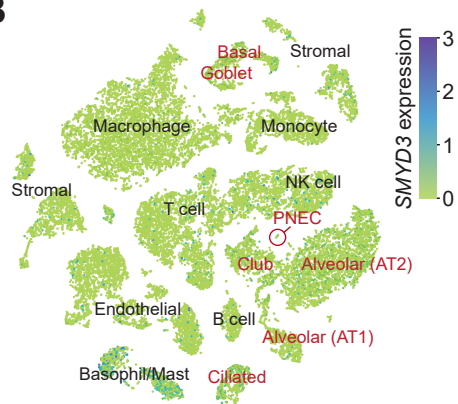

**C**

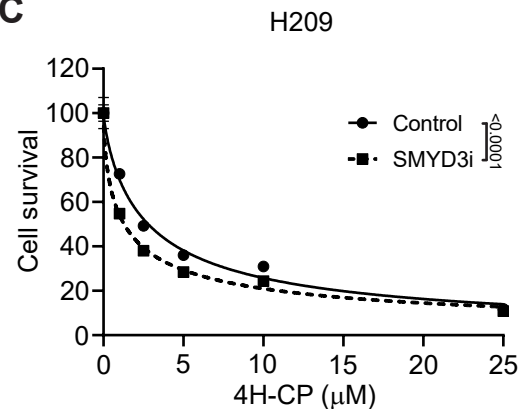

**D**

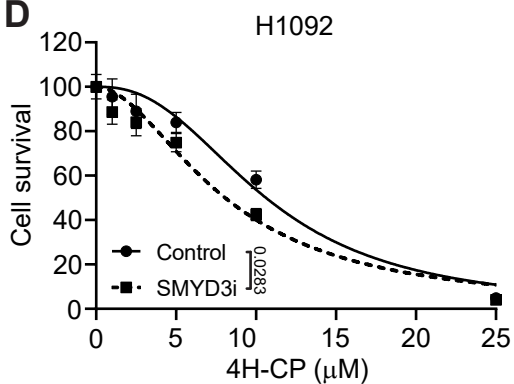

**E**

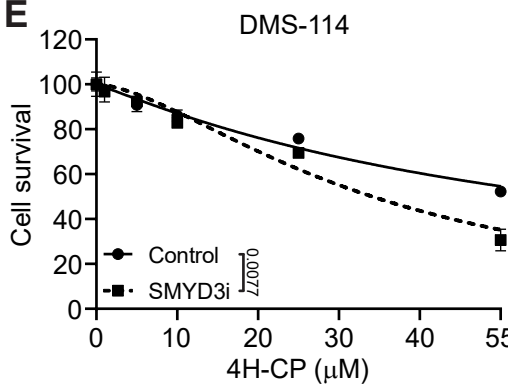

**F**

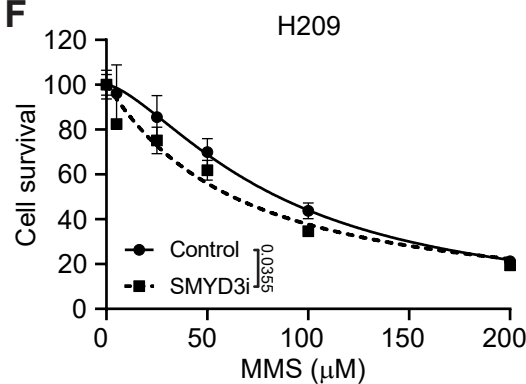

**G**

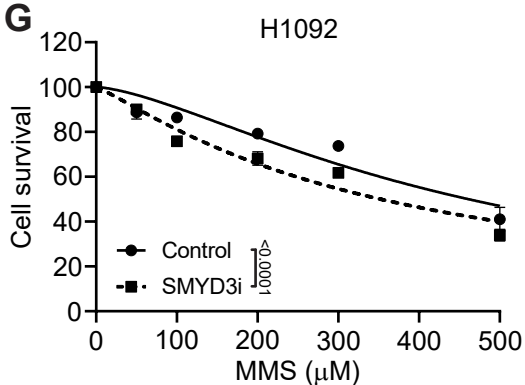

**H**

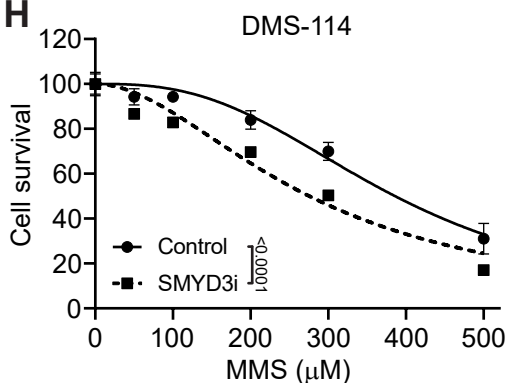

**I**

| Drug combination | Synergy score | Most synergistic area score | Method |
|------------------|---------------|-----------------------------|--------|
| SMYD3inh - 4H-CP | 12.92         | 17.99                       | Loewe  |

Chosen parameters:

Readout: viability ; Baseline correction: Yes ;

Dose-response curve for drug : 4H-CP

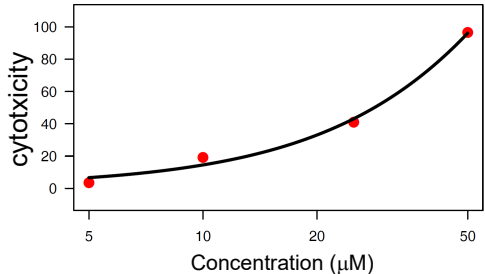

Dose-response curve for drug : SMYD3i

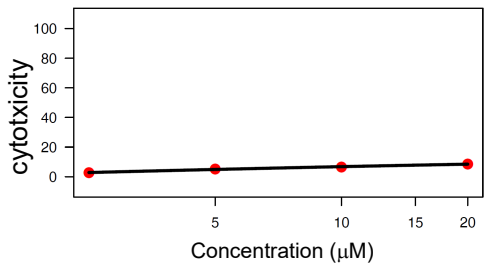

Dose-response matrix (inhibition)

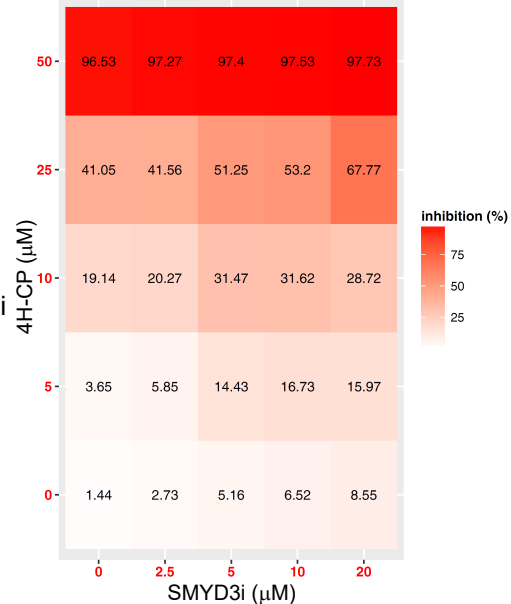

**J**

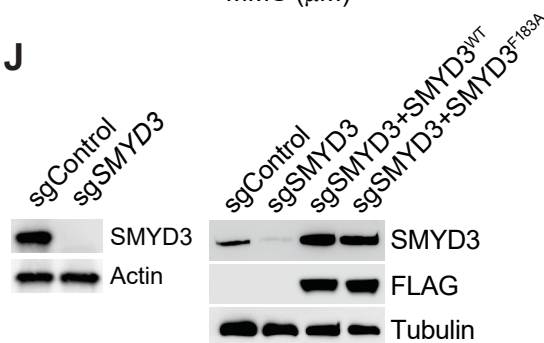

## Supplementary Figure S1. SMYD3 is a candidate regulator of SCLC susceptibility to alkylating chemotherapy

**A**, Synthetic lethality screening using a library comprised of 285 characterized inhibitors, testing H209 SCLC cells sensitivity to cisplatin genotoxicity. Data represent relative growth of H209 cells treated with a combination of cisplatin (1  $\mu$ M) and different inhibitors (1  $\mu$ M each) compared to cisplatin alone. **B**, Analysis of normal human lung single-cell RNA sequencing data reveals low *SMYD3* expression in pulmonary neuroendocrine cells (PNEC); clusters of cell types are labeled; lung epithelial cell types in red (Human Lung Cell Atlas (41)). **C-H**, H209, H1092 and DMS-114 SCLC cell viability assays using different concentrations of either 4H-CP (C-E) or MMS (F-H) with or without SMYD3i (EPZ031686). Percentage of viable cells under each condition was normalized to untreated cells. *P-value* were calculated by two-way ANOVA with Tukey's testing for multiple comparisons. Data are represented as non-linear regression with mean  $\pm$  SEM. **I**, Loewe synergy score calculated by SynergyFinder 2.0, with individual dose-response curves (left) and dose-response matrix (right) for 4H-CP and SMYD3i. **J**, Immunoblot analyses were performed using the indicated antibodies with lysates of H1092 engineered cells used in xenograft assays presented in Figures 1F-H. Actin or Tubulin are shown as a loading control.
